# Supplementary material for: A qualitative study on midwives’ identity and perspectives on the occurrence of disrespect and abuse in Maputo city
Source: Springer Nature journal article supplement (doi:10.1186/s12884-020-03320-0), 2020-10-19

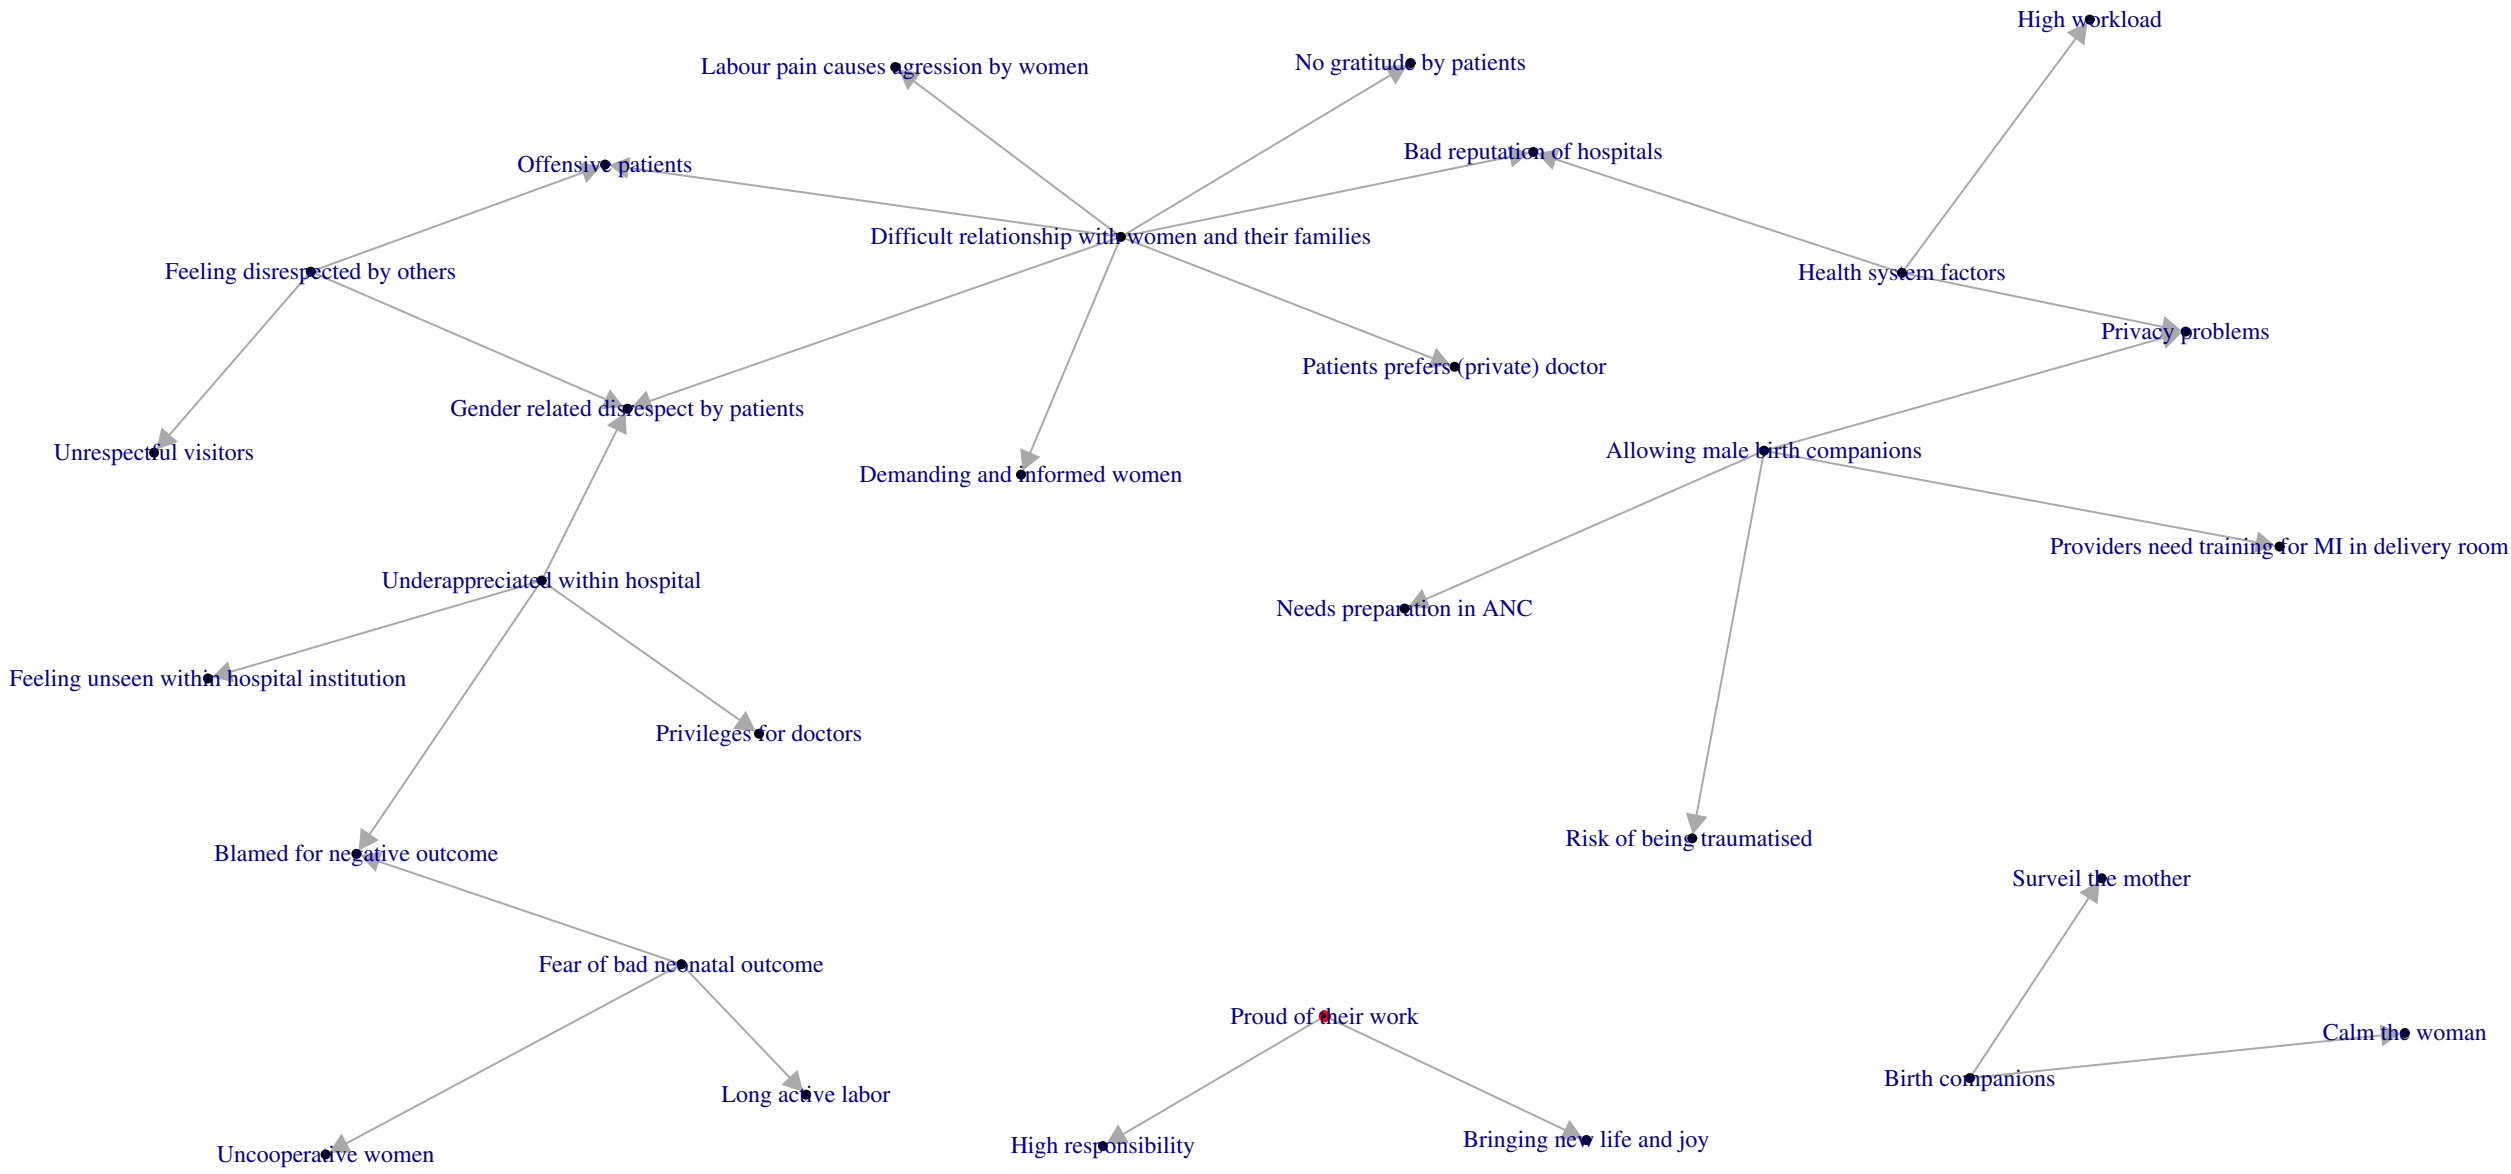

Supplement: MOESM2 [file 18499826]
